# Supplementary material for: Synthesis and characterization of rare-earth metal complexes supported by a new pentadentate Schiff base and their application in heteroselective polymerization of rac-lactide
Source: Royal Society of Chemistry journal article supplement (doi:10.1039/c5cy00322a), 2015-01-01
Supplement: c5cy00322a1.pdf [file c5cy00322a1.pdf]

## Supporting Information for:

### **Synthesis and characterization of lanthanide complexes supported by a new pentadentate schiff base and their application in the heteroselective polymerization of *rac*-lactide**

*Yu Cui, Weikai Gu, Yaorong Wang,\* Bei Zhao,\* Yingming Yao\* and Qi Shen*

Key Laboratory of Organic Synthesis of Jiangsu Province and Suzhou Key Laboratory of Macromolecular Design and Precision Synthesis, College of Chemistry, Chemical Engineering and Materials Science, Dushu Lake Campus, Soochow University, Suzhou 215123, People's Republic of China.

#### **Table S1. Crystallographic Data for Complexes 1-3 and 5-7**

**Fig. S1** Homonuclear decoupled <sup>1</sup>H NMR spectrum of the methine region of polylactide produced from *rac*-LA using complex 3 as initiator in THF.

**Fig. S2** Homonuclear decoupled <sup>1</sup>H NMR spectra of the methine region of polylactides produced from *rac*-LA using complex 2 as initiator at 25 and 0 °C

**Fig. S3** MALDI-TOF mass spectrum of *rac*-LA oligomer initiated by complex 7

**Fig. S4** <sup>1</sup>H NMR spectrum of *rac*-LA oligomer initiated by complex 2 in CDCl<sub>3</sub>

**Table S1. Crystallographic Data for Complexes 1-3 and 5-7**

| Compound                                      | 1·THF·0.5hexane                                                  | 2·THF·0.5toluene                                                   | 3·3THF                                                           | 5·3THF                                                            | 6·THF                                                                            | 7·THF                                                                           |
|-----------------------------------------------|------------------------------------------------------------------|--------------------------------------------------------------------|------------------------------------------------------------------|-------------------------------------------------------------------|----------------------------------------------------------------------------------|---------------------------------------------------------------------------------|
| Formula                                       | C <sub>64</sub> H <sub>88</sub> N <sub>2</sub> O <sub>5</sub> Sc | C <sub>64.5</sub> H <sub>85</sub> N <sub>2</sub> O <sub>5</sub> Yb | C <sub>73</sub> H <sub>105</sub> N <sub>2</sub> O <sub>8</sub> Y | C <sub>73</sub> H <sub>105</sub> N <sub>2</sub> O <sub>8</sub> Nd | C <sub>52</sub> H <sub>76</sub> N <sub>3</sub> O <sub>4</sub> Si <sub>2</sub> Yb | C <sub>52</sub> H <sub>76</sub> N <sub>3</sub> O <sub>4</sub> Si <sub>2</sub> Y |
| fw                                            | 1010.32                                                          | 1141.39                                                            | 1227.50                                                          | 1282.83                                                           | 1036.38                                                                          | 952.25                                                                          |
| T/K                                           | 223(2)                                                           | 223(2)                                                             | 223(10)                                                          | 223(10)                                                           | 293(2)                                                                           | 223(2)                                                                          |
| Crystal system                                | monoclinic                                                       | monoclinic                                                         | monoclinic                                                       | monoclinic                                                        | monoclinic                                                                       | monoclinic                                                                      |
| Space group                                   | <i>P</i> 2 <sub>1</sub> / <i>n</i>                               | <i>P</i> 2 <sub>1</sub> / <i>n</i>                                 | <i>P</i> 2 <sub>1</sub> / <i>c</i>                               | <i>P</i> 2 <sub>1</sub> / <i>c</i>                                | <i>P</i> 2 <sub>1</sub> / <i>n</i>                                               | <i>P</i> 2 <sub>1</sub> / <i>n</i>                                              |
| <i>a</i> /Å                                   | 12.8779(9)                                                       | 13.1060(3)                                                         | 10.8744(3)                                                       | 10.8719(18)                                                       | 17.715(10)                                                                       | 17.6572(6)                                                                      |
| <i>b</i> /Å                                   | 19.9196(14)                                                      | 19.8031(4)                                                         | 29.9882(13)                                                      | 30.0322(4)                                                        | 14.656(8)                                                                        | 14.6349(5)                                                                      |
| <i>c</i> /Å                                   | 24.2784(19)                                                      | 24.2374(5)                                                         | 21.5416(8)                                                       | 21.6152(5)                                                        | 20.41(2)                                                                         | 20.3043(7)                                                                      |
| $\beta$ /deg                                  | 103.146(7)                                                       | 103.0929(3)                                                        | 99.001(3)                                                        | 99.151(4)                                                         | 98.17(2)                                                                         | 98.333(3)                                                                       |
| <i>V</i> /Å <sup>3</sup>                      | 6064.8(7)                                                        | 6127.0(2)                                                          | 6938.3(4)                                                        | 6967.7(5)                                                         | 5247(7)                                                                          | 5191.5(3)                                                                       |
| <i>Z</i>                                      | 4                                                                | 4                                                                  | 4                                                                | 4                                                                 | 4                                                                                | 4                                                                               |
| <i>D</i> <sub>calcd</sub> /g cm <sup>-3</sup> | 1.107                                                            | 1.237                                                              | 1.175                                                            | 1.223                                                             | 1.312                                                                            | 1.218                                                                           |
| $\mu$ /mm <sup>-1</sup>                       | 0.168                                                            | 1.573                                                              | 0.894                                                            | 0.798                                                             | 1.872                                                                            | 1.214                                                                           |
| <i>F</i> (000)                                | 2188                                                             | 2384                                                               | 4026                                                             | 2724                                                              | 2156                                                                             | 2032                                                                            |
| Crystal size/mm                               | 0.30 x 0.20 x 0.10                                               | 0.60 x 0.40 x 0.20                                                 | 0.70 x 0.20 x 0.10                                               | 0.60 x 0.40 x 0.10                                                | 1.00 x 0.40 x 0.40                                                               | 0.40 x 0.30 x 0.20                                                              |
| $\theta$ <sub>max</sub> /deg                  | 26.37                                                            | 26.37                                                              | 26.37                                                            | 26.37                                                             | 27.51                                                                            | 26.37                                                                           |
| Collected                                     | 38195                                                            | 40384                                                              | 41035                                                            | 53214                                                             | 25045                                                                            | 37426                                                                           |
| Unique reflns                                 | 12384                                                            | 12514                                                              | 14175                                                            | 14233                                                             | 9748                                                                             | 10607                                                                           |
| GOF                                           | 1.044                                                            | 1.075                                                              | 1.021                                                            | 1.050                                                             | 0.995                                                                            | 0.976                                                                           |
| <i>R</i>                                      | 0.0696                                                           | 0.0364                                                             | 0.0658                                                           | 0.0418                                                            | 0.0595                                                                           | 0.0460                                                                          |
| w <i>R</i>                                    | 0.2074                                                           | 0.0950                                                             | 0.1922                                                           | 0.1157                                                            | 0.1364                                                                           | 0.0878                                                                          |
| <i>R</i> <sub>int</sub>                       | 0.0598                                                           | 0.0340                                                             | 0.0613                                                           | 0.0447                                                            | 0.0588                                                                           | 0.0714                                                                          |
| Largest diff. peak and hole/e Å <sup>-3</sup> | 0.691 and -0.421                                                 | 1.401 and -0.721                                                   | 0.764 and -0.809                                                 | 1.078 and -0.589                                                  | 0.748 and -1.164                                                                 | 0.334 and -0.390                                                                |

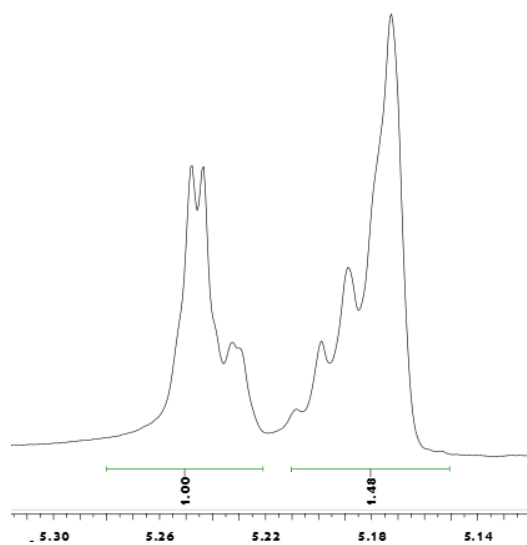

**Fig. S1** Homonuclear decoupled  $^1\text{H}$  NMR spectrum of the methine region of poly(lactide) produced from *rac*-LA using complex **3** as initiator in THF at 25 °C ( $P_r = 0.81$ , Table 3, entry 8, 400 MHz,  $\text{CDCl}_3$ .)

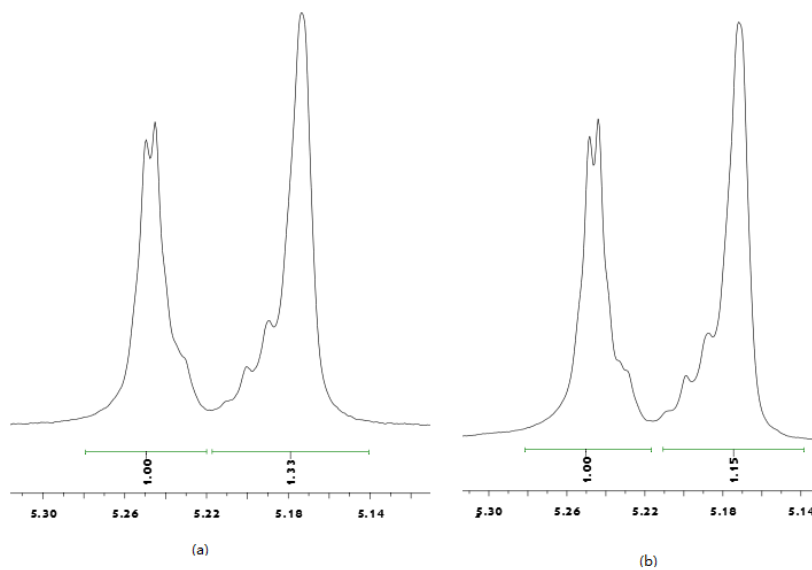

**Fig. S2** Homonuclear decoupled  $^1\text{H}$  NMR spectrum of the methine region of poly(lactides) produced from *rac*-LA using complex **2** as initiator ((a) at 25 °C,  $P_r = 0.85$ , Table 3, entry 3; (b) at 0 °C,  $P_r = 0.93$ , Table 3, entry 7, 400 MHz,  $\text{CDCl}_3$ .)

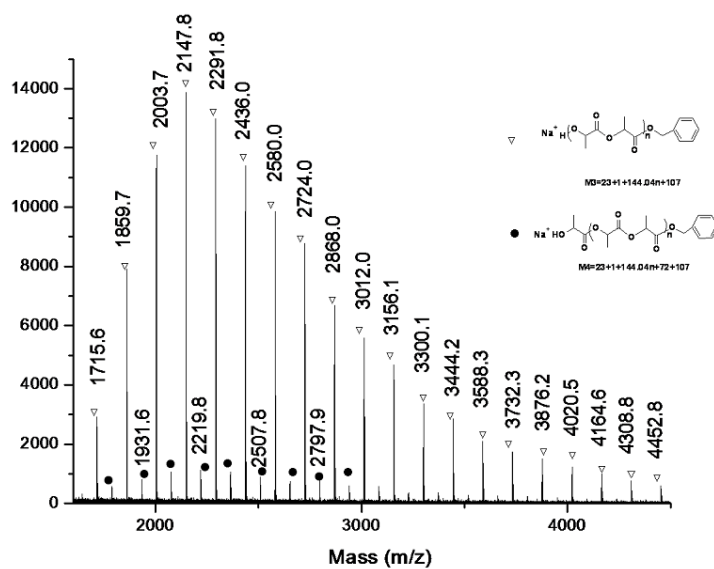

**Fig. S3** MALDI-TOF mass spectrum of *rac*-LA oligomer initiated by complex **7** ( $[M]_0/[I]_0 = 20:1$ , in THF, 25 °C; doped with  $CF_3CO_2Na$ ).

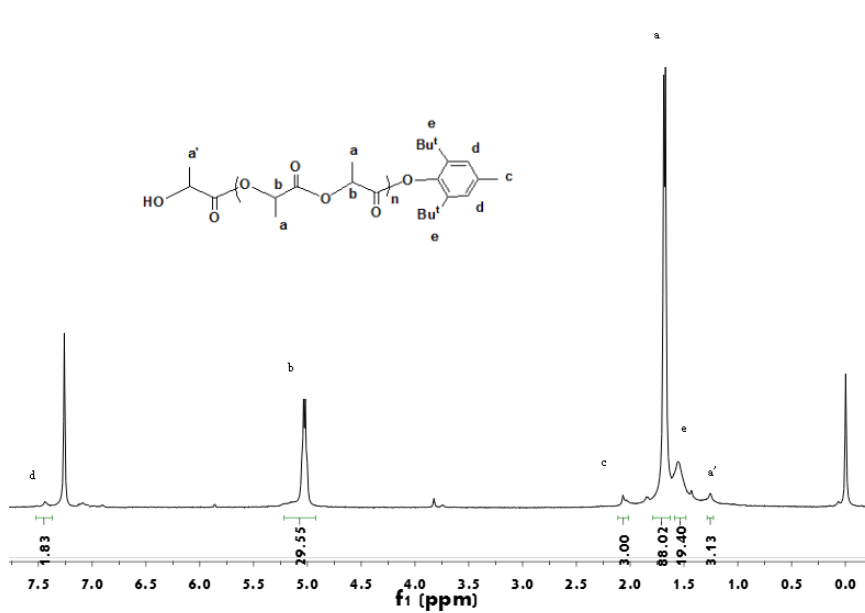

**Fig. S4.**  $^1H$  NMR spectrum of *rac*-LA oligomer initiated by complex **2** in  $CDCl_3$  ( $[M]/[I] = 20:1$ , in THF, 25 °C).
